# Supplementary material
Source: Research Square preprint supplement (doi:10.21203/rs.3.rs-8959694/v1)
Supplement: Supplementary file 1 [file 6d10d3a39f371b2cdfe35820.docx]

**SUPPLEMENTERY DATA**

**Supplementary Table 1.** Questionnaire developed for the study.

| Questions |
| --- |
| The Erasmus exchange allowed me to… |
| ... Know myself better |
| … Build my self-confidence |
| … Experience a higher academic level |
| … Experience another kind of education system |
| … Discover another health system |
| … Learn /improve myself in local language |
| … Learn/improve myself in English |
| …Meet students/people from different countries |
| …Meet students/people from the Erasmus welcoming country |
| … Learn about other cultures |
| … Live an adventure |
| ...Live experiences on a university campus |
| … have fun |
| … travel |
| ... improve career prospects |
| ... have a supplementary international experience during my residency or fellowship |
| I was welcomed well by the host university |
| I was well accompanied by my university (International relationships office) |
| Accommodation was nice |
| Transportation was easy |

| Questions |
| --- |
| Among these affirmations, which were some drawbacks of Erasmus exchange ? |
| I had to study by myself one or multiple subjects not studied during my Erasmus |
| I had to attend different classes to catch up on topics not studied during my Erasmus |
| I am falling behind compared to other students in my level/academic year |
| Expenses spent during my Erasmus are too high |
| The personal benefit of doing an Erasmus is not compensated by its cost |
| I felt limited by my lack of skills in local language |
| I felt limited by my incomplete skills in English |
| Separation from family and friends was too long |
| I had trouble with reintegration |

**Comments written by ERASMUS students in the online survey**

“Discovering a new culture, new landscapes had a super positive impact, especially after the lockdowns”.

“The memories will last forever! And I thank you so much for this opportunity! The return to reality was nevertheless difficult for me. If I had to do it all over again, I would! I'm also in the process of finding out about a summer internship abroad.”

“It's really one of my best experiences to have gone during my 3rd year, I'm taking my final exams this year and I don't think I've had any shortcomings in my work compared to the others in the class, I see it as nothing but a plus: learning a new language, discovering another culture, meeting students. Thank you!”

“There were a few difficulties, particularly with the curriculums, which were linked to the leap into the unknown at every point. But oh so worth it!!!! One of the best experiences of my studies, it was absolutely brilliant, I can only recommend it :)))”

“Incredible experience, I hope you manage to develop it further so that as many students as possible can benefit from it!!!!”

“It was very enriching for me to spend a year practicing medicine in Spanish, and the internships were particularly interesting. Sometimes you think you're not going to make it, that it's going to be very hard to understand everything. And you'll have some truly unforgettable moments of leisure and travel, and with some personal investment you'll be able to speak the language fluently on your return - I recommend going for the whole year to really immerse yourself and speak the language well, even if it scares some people. “

“In order not to fall behind when you return, you have to work very regularly and seriously, but you can really have fun and pursue your medical curriculum in a very serious way when you return without no problems.”

“An unforgettable, life-changing experience.”

“Go for it! You only have one life, and it's a unique and tremendously enriching experience. It allows you to gain maturity, and this maturity/solidity will be a major asset for your entire medical career. It's a stress-free experience, and you'll never regret it.”

“Experience recommended +++, giving an openness of mind, an ability to adapt and a breath of fresh air that I feel are indispensable in the context of our long years of medical studies.”

“It's the best choice I could have made during my studies. It's an incredible experience, full of encounters, memories and adventures, which teaches us an enormous amount about ourselves. You shouldn't be afraid to take the plunge just because you're in medical school. Studies are long, so you have to take advantage when the time comes, before the clerkship if possible. I recommend +++ (I'm still a bit nostalgic about this year ;))”

“Absolutely crazy. A must for everyone, you learn so much about yourself abroad! It's a real breath of fresh air before facing the difficulties of clinical rotations in medical school.”
